# Supplementary material for: Psychosocial job stressors and risk of suicidal behavior – an observational study among Swedish men
Source: PubMed Central journal article supplement (PMC9888439; doi:10.5271/sjweh.4039), 2022-08-31
Supplement: SJWEH-48-435-S001.pdf [file SJWEH-48-435-S001.pdf]

## **Psychosocial job stressors and risk of suicidal behavior – an observational study among Swedish men<sup>1</sup>**

*by Maria Åberg, MD, PhD,<sup>2</sup> Elisabeth Staats, MD, Josefina Robertson, MD, PhD, Linus Schiöler, PhD, Kjell Torén, MD, PhD, Anthony D LaMontagne, ScD, Mia Söderberg, PhD, Margda Waern, MD, PhD, Jenny Nyberg, PhD*

1. Supplementary material
2. Correspondence to: Dr Maria Åberg, School of Public Health and Community Medicine / Primary Health Care, Institute of Medicine, Box 454, SE-405 30 Gothenburg, Sweden. [E-mail: [maria.berg@gu.se](mailto:maria.berg@gu.se)]

**Table S1.** Hazard ratios (95% CIs) non-fatal suicidal behavior in working aged men, by JDC category. For each exposure category number of events during follow-up (No events) and number of events per 10 000 person-years are included.

| JDC category             | Model I <sup>a</sup><br>HR (95% CI)<br>No events/ per<br>10 000 person-<br>years | Model II <sup>b</sup><br>HR (95% CI)<br>No events/ per<br>10 000 person-<br>years | Model III <sup>c</sup><br>HR (95% CI)<br>No events/ per<br>10 000 person-<br>years | Model IV <sup>d</sup><br>HR (95% CI)<br>No events/ per<br>10 000 person-<br>years |
|--------------------------|----------------------------------------------------------------------------------|-----------------------------------------------------------------------------------|------------------------------------------------------------------------------------|-----------------------------------------------------------------------------------|
| <b>Events/population</b> | 6420/1 476 341                                                                   | 6225/1 440 753                                                                    | 5593/1 328 058                                                                     | 5559/1 322 425                                                                    |
| <b>Active</b>            | 0.50 (0.46–0.54)<br>1208/2.2                                                     | 0.54 (0.49–0.58)<br>1171/2.1                                                      | 0.61 (0.56–0.67)<br>1087/2.1                                                       | 0.66 (0.60–0.73)<br>1086/2.1                                                      |
| <b>High strain</b>       | 1.11 (1.01–1.22)<br>943/4.5                                                      | 1.16 (1.05–1.27)<br>911/4.5                                                       | 1.17 (1.06–1.29)<br>833/4.4                                                        | 1.18 (1.07–1.30)<br>828/4.4                                                       |
| <b>Passive</b>           | 1.60 (1.49–1.72)<br>3337/6.2                                                     | 1.58 (1.47–1.70)<br>3247/6.2                                                      | 1.47 (1.36–1.59)<br>2872/6.0                                                       | 1.42 (1.31–1.53)<br>2848/6.0                                                      |
| <b>Low strain</b>        | 1 (reference)<br>932/4.0                                                         | 1 (reference)<br>896/3.9                                                          | 1 (reference)<br>801/3.8                                                           | 1 (reference)<br>797/3.8                                                          |

<sup>a</sup>Model I unadjusted

<sup>b</sup>Model II adjusted for conscription year and parental education

<sup>c</sup>Model III additionally adjusted for stress resilience

<sup>d</sup>Model IV additionally adjusted for IQ

**Table S2.** Hazard ratios (95% CIs) for non-fatal suicidal behavior in working aged men, by JDC category excluding men with a psychiatric diagnosis (F-diagnosis) at time of conscription.

| JDC category             | Model I <sup>a</sup><br>HR (95% CI)<br>No events/ per<br>10 000 person-<br>years | Model II <sup>b</sup><br>HR (95% CI)<br>No events/ per<br>10 000 person-<br>years | Model III <sup>c</sup><br>HR (95% CI)<br>No events/ per<br>10 000 person-<br>years | Model IV <sup>d</sup><br>HR (95% CI)<br>No events/ per<br>10 000 person-<br>years |
|--------------------------|----------------------------------------------------------------------------------|-----------------------------------------------------------------------------------|------------------------------------------------------------------------------------|-----------------------------------------------------------------------------------|
| <b>Events/population</b> | 5843/1 418 703                                                                   | 5669/1 386 124                                                                    | 5115/1 279 838                                                                     | 5085/1 274 504                                                                    |
| <b>Active</b>            | 0.50 (0.46–0.55)<br>1135/2.1                                                     | 0.54 (0.49–0.59)<br>1101/2.1                                                      | 0.61 (0.55–0.67)<br>1030/2.0                                                       | 0.66 (0.60–0.73)<br>1029/2.0                                                      |
| <b>High strain</b>       | 1.11 (1.01–1.22)<br>857/4.3                                                      | 1.15 (1.05–1.27)<br>829/4.2                                                       | 1.17 (1.05–1.29)<br>761/4.2                                                        | 1.17 (1.06–1.30)<br>756/4.2                                                       |
| <b>Passive</b>           | 1.58 (1.46–1.71)<br>2999/5.8                                                     | 1.56 (1.44–1.69)<br>2920/5.8                                                      | 1.45 (1.34–1.57)<br>2585/5.7                                                       | 1.39 (1.28–1.51)<br>2564/5.7                                                      |
| <b>Low strain</b>        | 1 (reference)<br>852/3.8                                                         | 1 (reference)<br>819/3.8                                                          | 1 (reference)<br>739/3.7                                                           | 1 (reference)<br>736/3.7                                                          |

<sup>a</sup>Model I unadjusted

<sup>b</sup>Model II adjusted for conscription year and parental education

<sup>c</sup>Model III additionally adjusted for stress resilience

<sup>d</sup>Model IV additionally adjusted for IQ

**Table S3.** Hazard ratios (95% CIs) for the job strain components (job control / job demand) and risk of suicidal behavior in working aged men.

| Category                 | Model I <sup>a</sup><br>HR (95% CI)<br>No events/ per<br>10 000 person-<br>years | Model II <sup>b</sup><br>HR (95% CI)<br>No events/ per<br>10 000 person-<br>years | Model III <sup>c</sup><br>HR (95% CI)<br>No events/ per<br>10 000 person-<br>years | Model IV <sup>d</sup><br>HR (95% CI)<br>No events/ per<br>10 000 person-<br>years |
|--------------------------|----------------------------------------------------------------------------------|-----------------------------------------------------------------------------------|------------------------------------------------------------------------------------|-----------------------------------------------------------------------------------|
| <b>Events/population</b> | 8431/1 476 341                                                                   | 8162/1 440 753                                                                    | 7419/1 328 058                                                                     | 7374/1 322 425                                                                    |
| <b>High control</b>      | 0.47 (0.45–0.49)<br>2962/3.7                                                     | 0.50 (0.47–0.52)<br>2857/3.7                                                      | 0.57 (0.54–0.59)<br>2649/3.6                                                       | 0.61 (0.58–0.64)<br>2641/3.6                                                      |
| <b>Low control</b>       | 1 (reference)<br>5469/7.3                                                        | 1 (reference)<br>5305/7.2                                                         | 1 (reference)<br>4770/7.2                                                          | 1 (reference)<br>4733/7.2                                                         |
| <b>High demand</b>       | 0.49 (0.47–0.51)<br>2925/3.8                                                     | 0.53 (0.50–0.55)<br>2837/3.8                                                      | 0.61 (0.58–0.64)<br>2645/3.7                                                       | 0.66 (0.62–0.69)<br>2636/3.7                                                      |
| <b>Low demand</b>        | 1 (reference)<br>5506/7.1                                                        | 1 (reference)<br>5325/7.1                                                         | 1 (reference)<br>4774/7.0                                                          | 1 (reference)<br>4738/6.9                                                         |

<sup>a</sup>Model I unadjusted

<sup>b</sup>Model II adjusted for conscription year and parental education

<sup>c</sup>Model III additionally adjusted for stress resilience

<sup>d</sup>Model IV additionally adjusted for IQ

**Table S4.** Hazard ratios (95% CIs) for the job strain components (job control / job demand) and risk of suicidal behavior in working aged men excluding men with a psychiatric diagnosis (F-diagnosis) at time of conscription.

| Category                 | Model I <sup>a</sup><br>HR (95% CI)<br>No events/ per<br>10 000 person-<br>years | Model II <sup>b</sup><br>HR (95% CI)<br>No events/ per<br>10 000 person-<br>years | Model III <sup>c</sup><br>HR (95% CI)<br>No events/ per<br>10 000 person-<br>years | Model IV <sup>d</sup><br>HR (95% CI)<br>No events/ per<br>10 000 person-<br>years |
|--------------------------|----------------------------------------------------------------------------------|-----------------------------------------------------------------------------------|------------------------------------------------------------------------------------|-----------------------------------------------------------------------------------|
| <b>Events/population</b> | 7735/1 418 703                                                                   | 7497/1 386 124                                                                    | 6846/1 279 838                                                                     | 6806/1 274 504                                                                    |
| <b>High control</b>      | 0.48 (0.46–0.50)<br>2771/3.6                                                     | 0.50 (0.48–0.53)<br>2675/3.6                                                      | 0.57 (0.54–0.60)<br>2498/3.5                                                       | 0.61 (0.58–0.64)<br>2491/3.5                                                      |
| <b>Low control</b>       | 1 (reference)<br>4964/6.9                                                        | 1 (reference)<br>4822/6.9                                                         | 1 (reference)<br>4348/6.8                                                          | 1 (reference)<br>4315/6.8                                                         |
| <b>High demand</b>       | 0.49 (0.47–0.52)<br>2728/3.7                                                     | 0.53 (0.51–0.56)<br>2648/3.6                                                      | 0.60 (0.57–0.64)<br>2483/3.6                                                       | 0.65 (0.62–0.69)<br>2474/3.6                                                      |
| <b>Low demand</b>        | 1 (reference)<br>5007/6.8                                                        | 1 (reference)<br>4849/6.7                                                         | 1 (reference)<br>4363/6.6                                                          | 1 (reference)<br>4332/6.6                                                         |

<sup>a</sup>Model I unadjusted

<sup>b</sup>Model II adjusted for conscription year and parental education

<sup>c</sup>Model III additionally adjusted for stress resilience

<sup>d</sup>Model IV additionally adjusted for IQ
